# Supplementary material for: Quinone-amine polymers prepared by simple precipitation polymerization and used as cathodes for aqueous zinc-ion batteries and electrochromic materials
Source: Royal Society of Chemistry journal article supplement (doi:10.1039/d4tc00474d), 2024-01-01
Supplement: d4tc00474d1.pdf [file d4tc00474d1.pdf]

## Supporting information

Quinone-amine polymers prepared by simple precipitation polymerization and used as cathodes for aqueous zinc-ion batteries and electrochromic materials

Jinli Liang,<sup>a</sup> Yanjun Hou;<sup>\*a</sup> Yamei You,<sup>a</sup> Liyan Dong,<sup>a</sup> Binhua Mei,<sup>a</sup> Haijun Niu<sup>\*b</sup>

### Experimental section

**Synthesis of monomer :** The process used to create the monomer is depicted in Figure 1. First, p-fluoronitrobenzene(10 mol, 1.41 g) and aniline(5 mol, 0.47 g) were reacted with dimethylsulfoxide solution(100 mL) and cesium fluoride(10 mol, 1.02 g) under catalysis for 48 hours at 140°C. After the reaction was finished, the mixture was poured into iced water while being stirred and filtered to produce 4,4'-dinitrotriphenylamine(yield: 87%, 1.46 g). Next, 4,4'-dinitrotriphenylamine(4.35 mol, 1.46 g) was reduced in a palladium (1mol, 0.11 g)and hydrazine hydrate(10 mL) in ethylene glycol solution(100 mL) at 120°C for eight hours. Finally, 4,4'-diamino triphenylamine was obtained by filtering the palladium carbon and adding it to iced water while stirring and filtering(yield: 57.7%, 2.51 mol, 0.69 g). To obtain a white crude product, the crude product was first refined using silica gel column chromatography (petroleum ether: dichloromethane = 1:1) and then further refined by recrystallization. (ether: dichloromethane = 2:1) and subsequently refined further via recrystallization, yielding a white solid in 57% of the sample, <sup>1</sup>H NMR (400 MHz, DMSO-*d*<sub>6</sub>) δ 7.13 – 6.94 (m, 2H), 6.80 (d, *J* = 8.2 Hz, 4H), 6.69 – 6.43 (m, 7H), 4.96 (s, 4H).

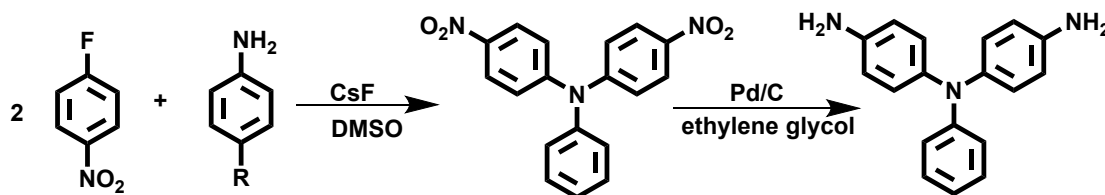

**Scheme 1.** Synthetic reaction pathway of TPA.

**Synthesis of polymer :** PQA and PQACl were synthesized using a straightforward chemical polymerization process. In an ethanol solvent, BQ and TCB, respectively, were reacted with 4,4'-diamino triphenylamine at 80 °C for 8 hours. The mixture finished product was added to ice-cold methanol, mixed, filtered, and then extracted using methanol by Soxhlet extraction.

<sup>a</sup> Key Laboratory of Chemistry, Chemical Engineering and Materials, High-Quality Technology Conversion, Heilongjiang Province & School of Chemistry and Chemical Engineering, Heilongjiang University, Harbin, China. E-mail: houyj@hlju.edu.cn

<sup>b</sup> Key Laboratory of Functional Inorganic Material Chemistry, Ministry of Education & Department of Macromolecular Science and Engineering, School of Chemistry and Chemical Engineering, Heilongjiang University, Harbin, China

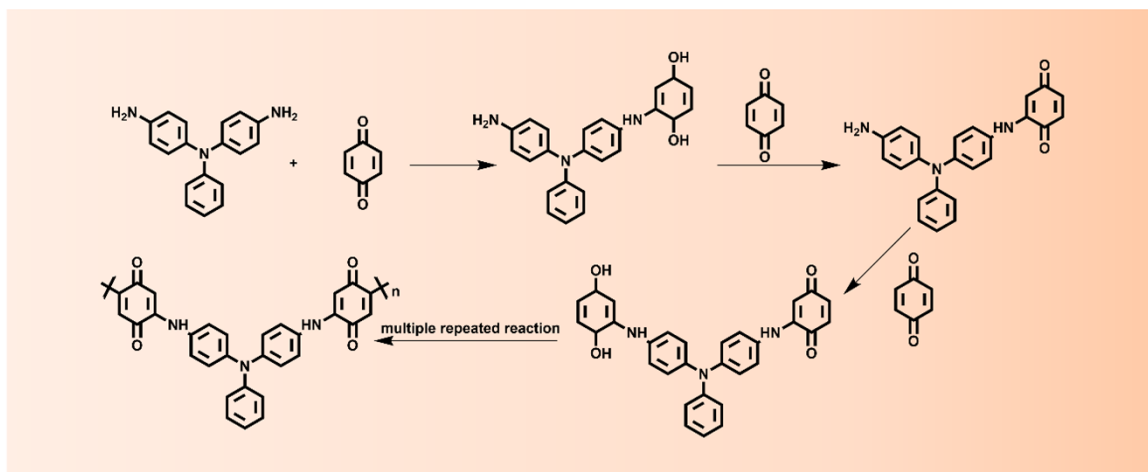

**Figure S1.** The detailed reaction flow chart of PQAHA.

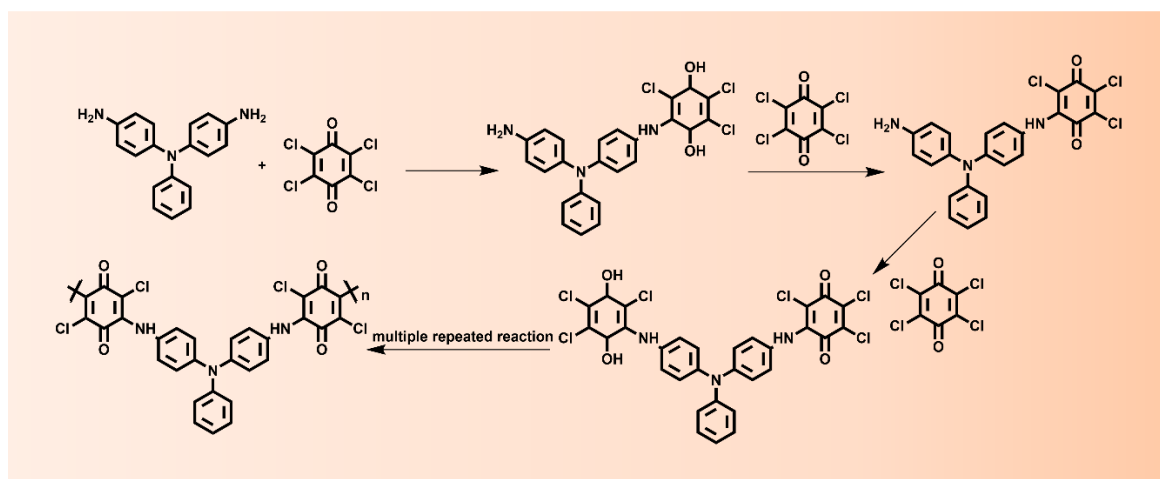

**Figure S2.** The detailed reaction flow chart of PQAHA.

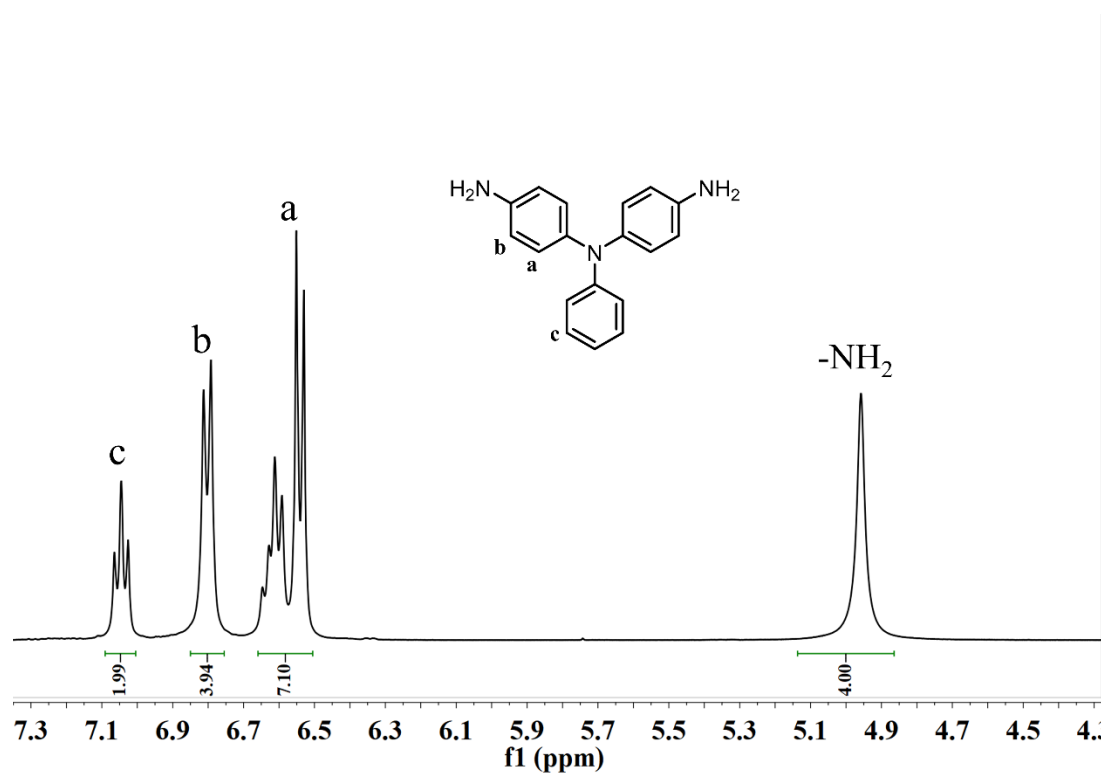

**Figure S3.** <sup>1</sup>H NMR spectrum of 4,4'-diamino triphenylamine.

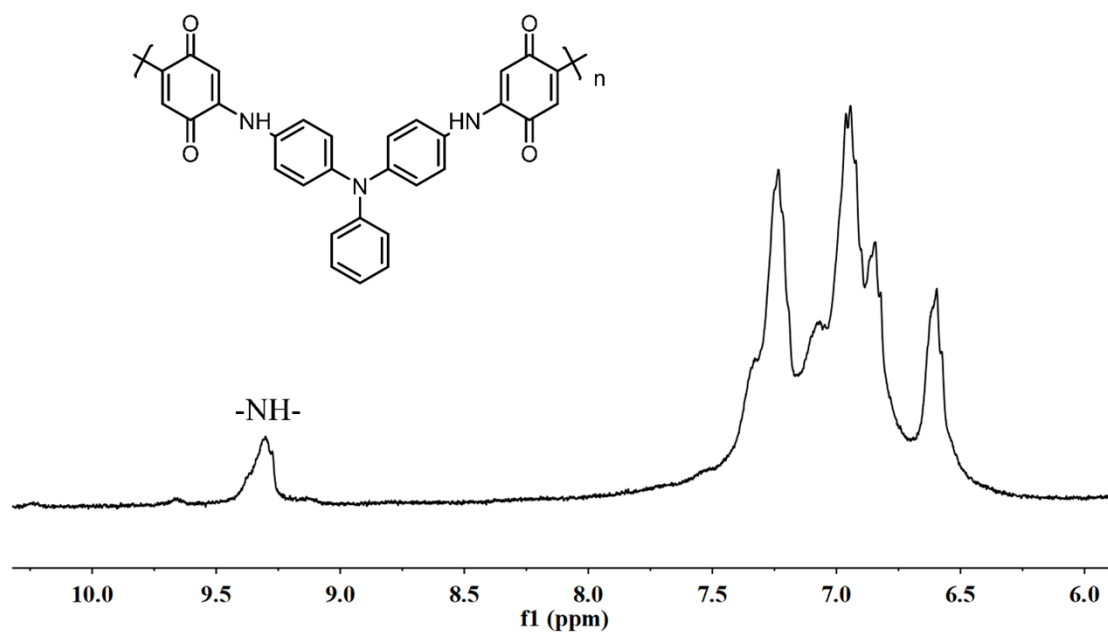

**Figure S4.** <sup>1</sup>H NMR spectrum of PQA.

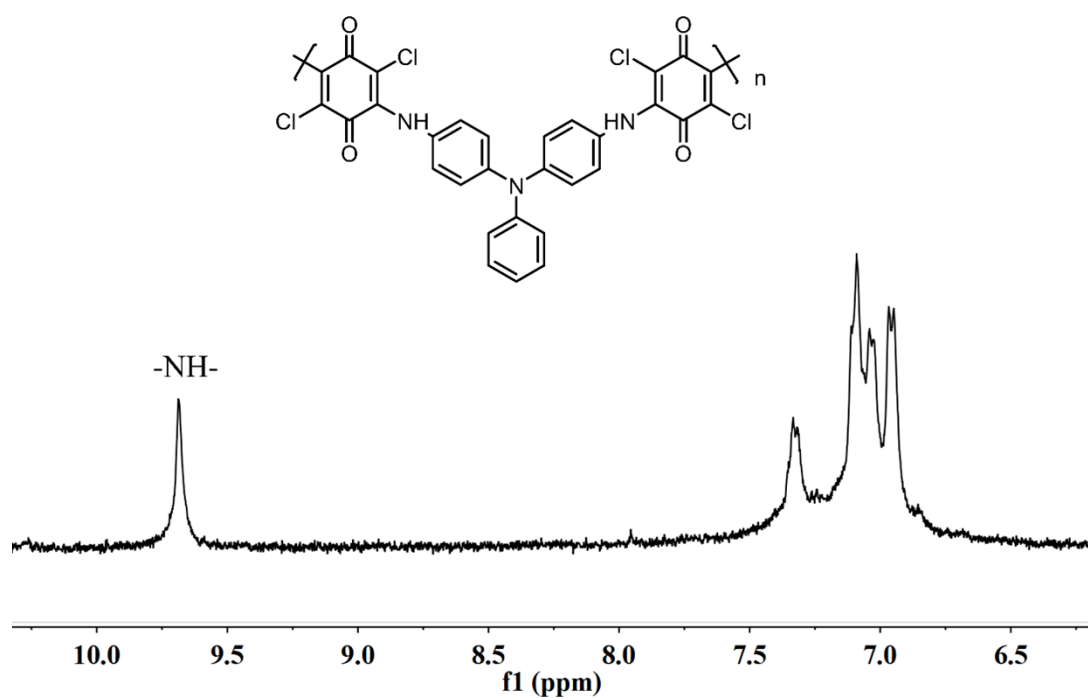

**Figure S5.** <sup>1</sup>H NMR spectrum of PQACl.

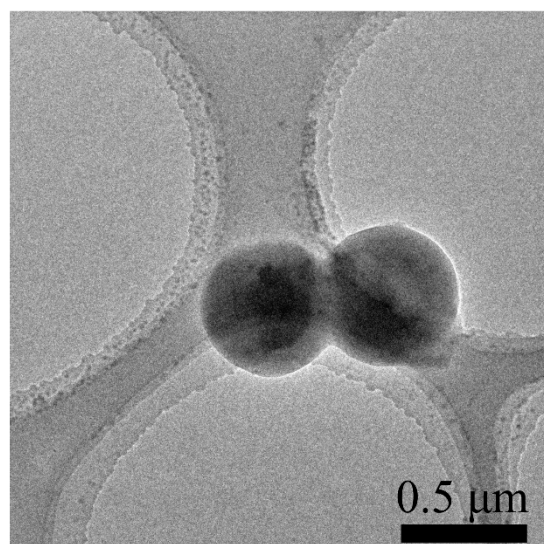

**Figure S6.** TEM image of PQAH.

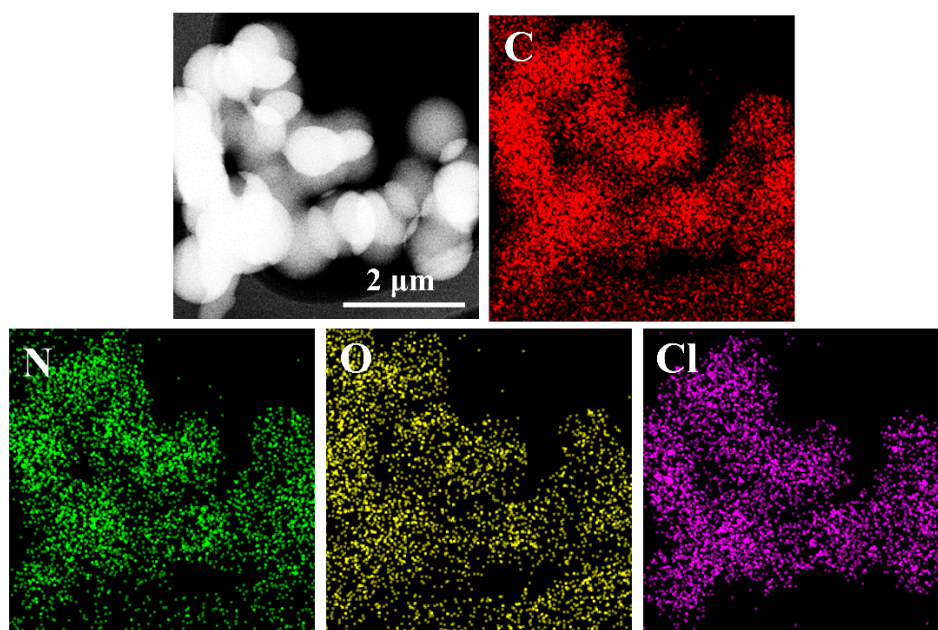

**Figure S7.** TEM-mapping images of PQACl.

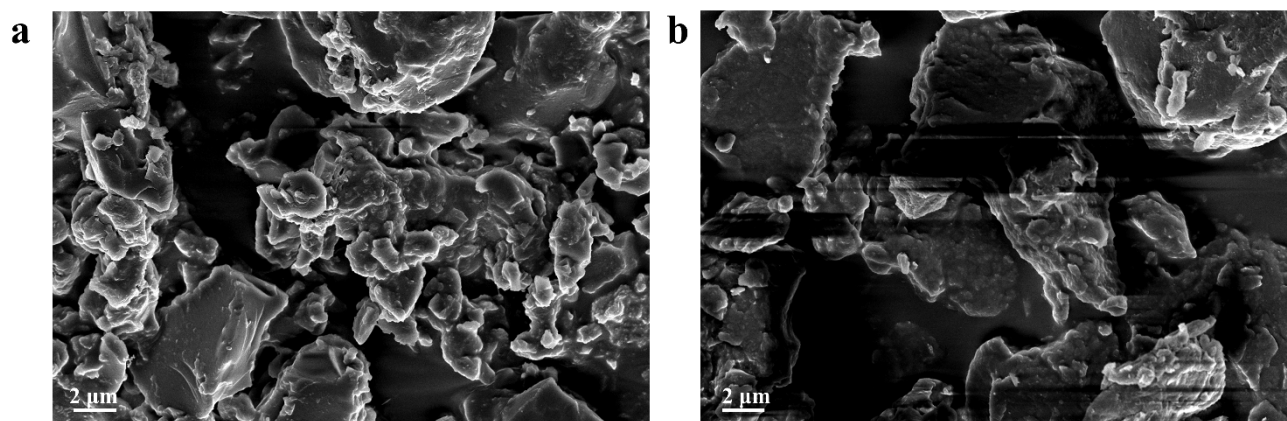

**Fig S8.** SEM images of PQA H (a) and PQACl (b)

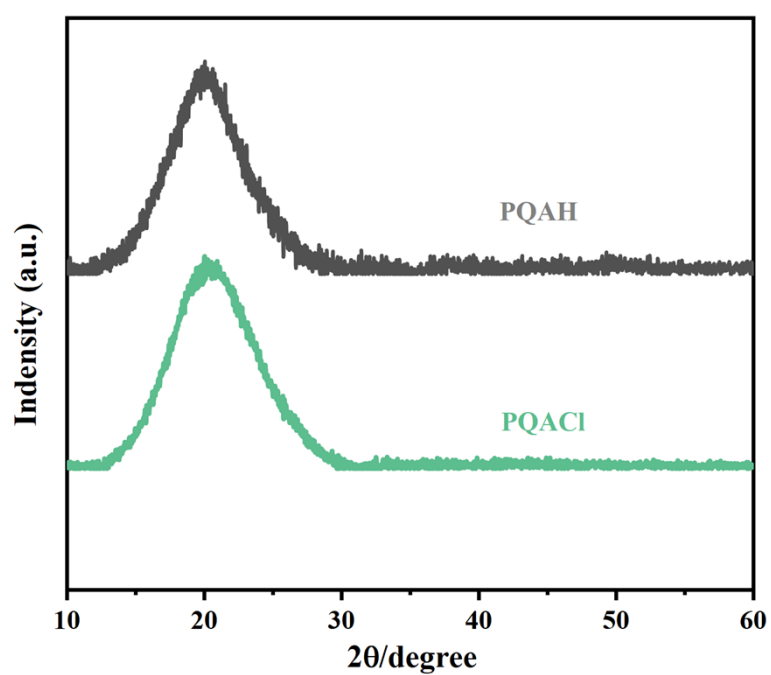

**Fig S9.** The characterizations of PQA and PQACl XRD.

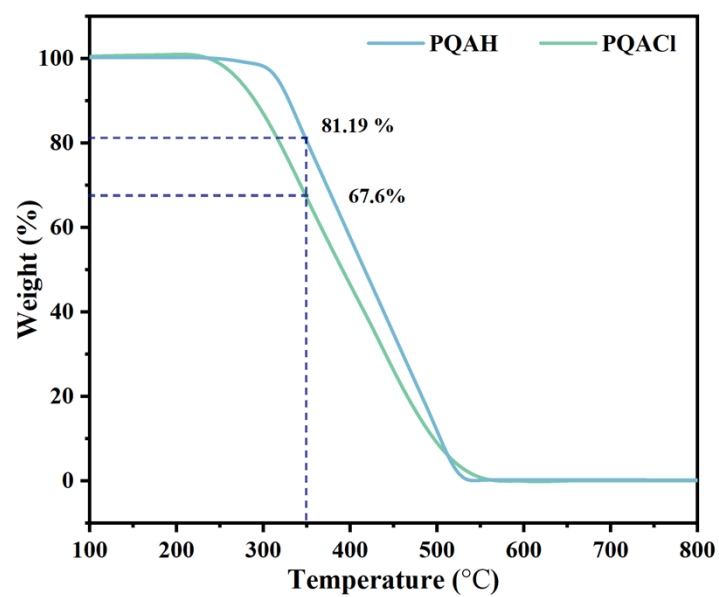

**Fig S10.** Thermogravimetric curve of PQA and PQACl

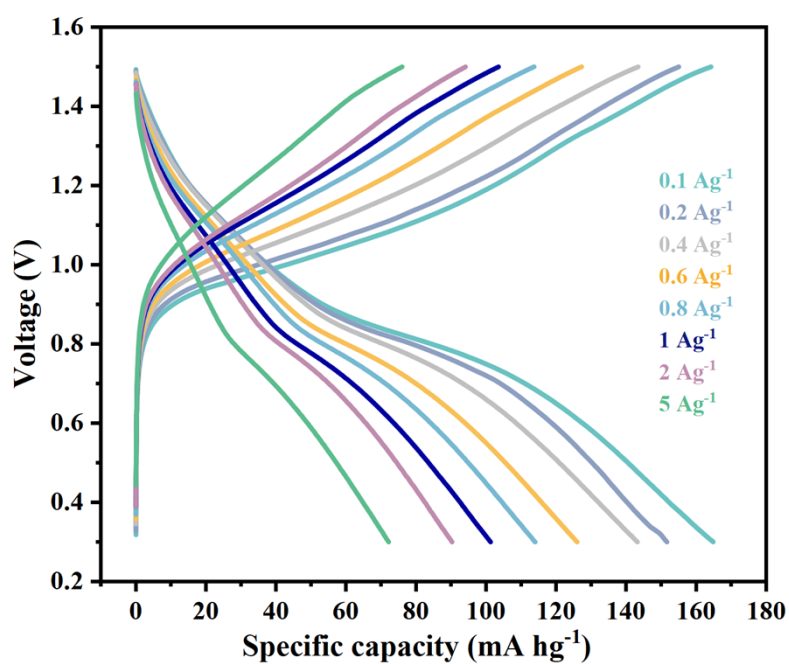

**Fig S11.** Charge-discharge curves of PQACl at different current densities.

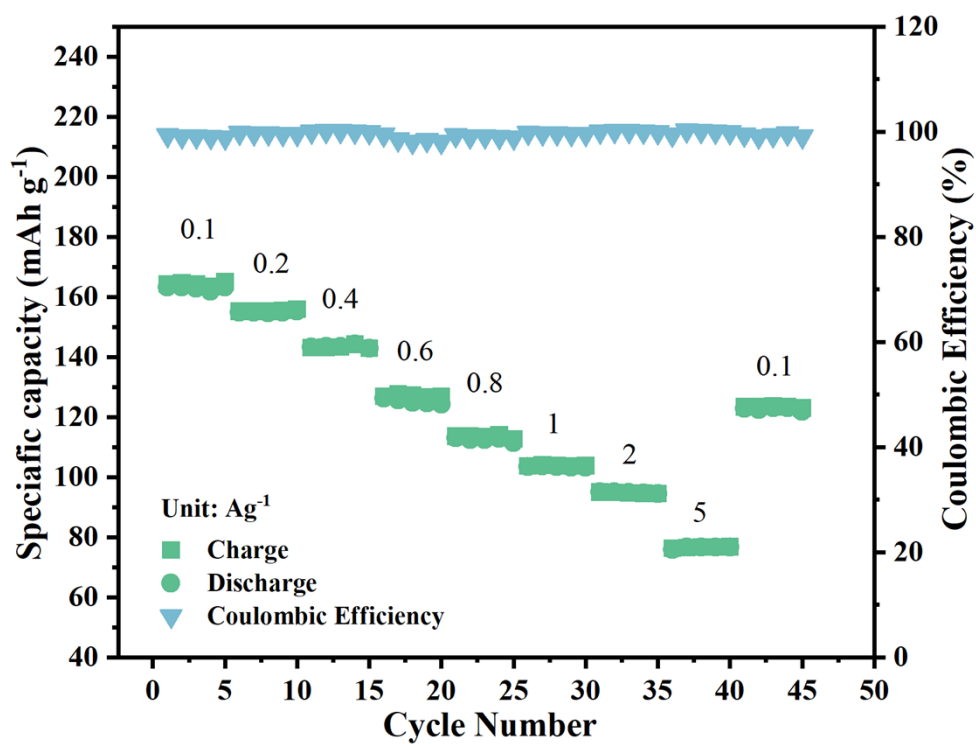

**Fig S12.** PQACl with varying current densities rate performance.

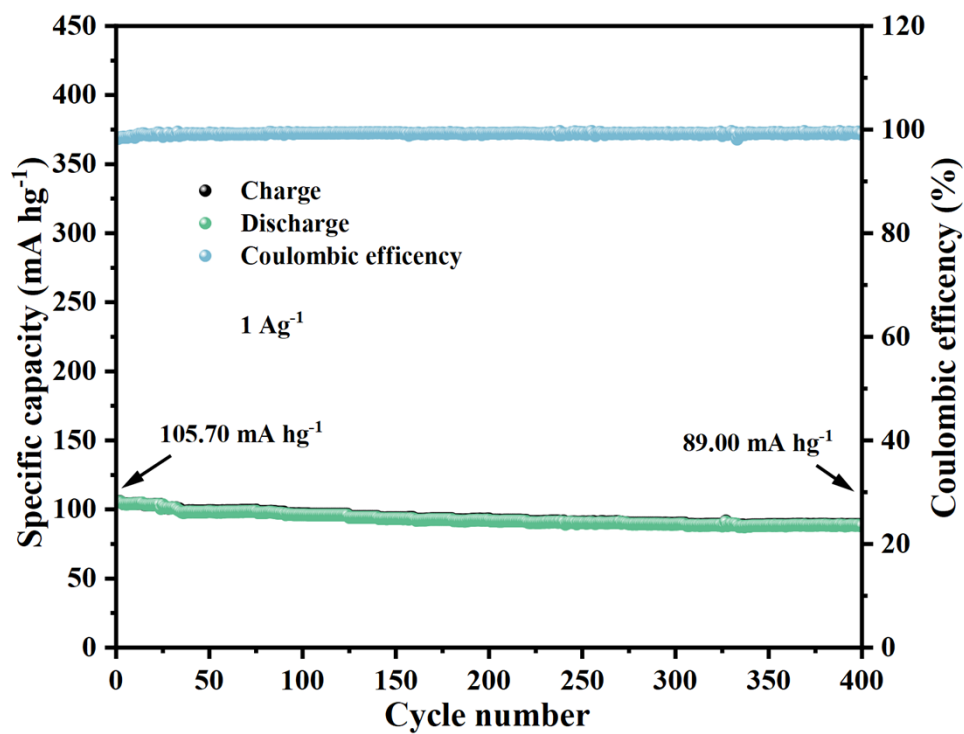

Fig S13. Cycle stability of PQACl running at  $1 \text{ A g}^{-1}$ .

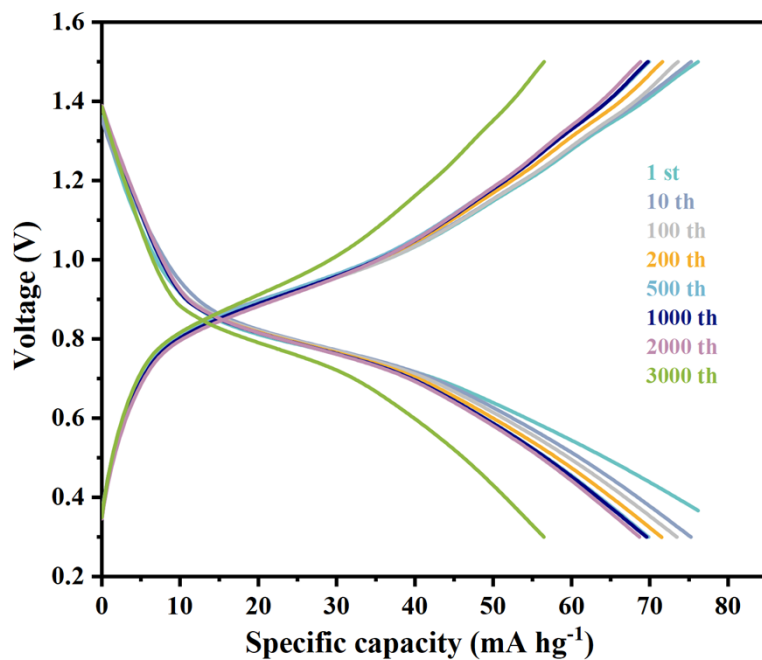

Fig S14. Discharge-charge curves of PQACl half-cell running at  $5 \text{ A g}^{-1}$



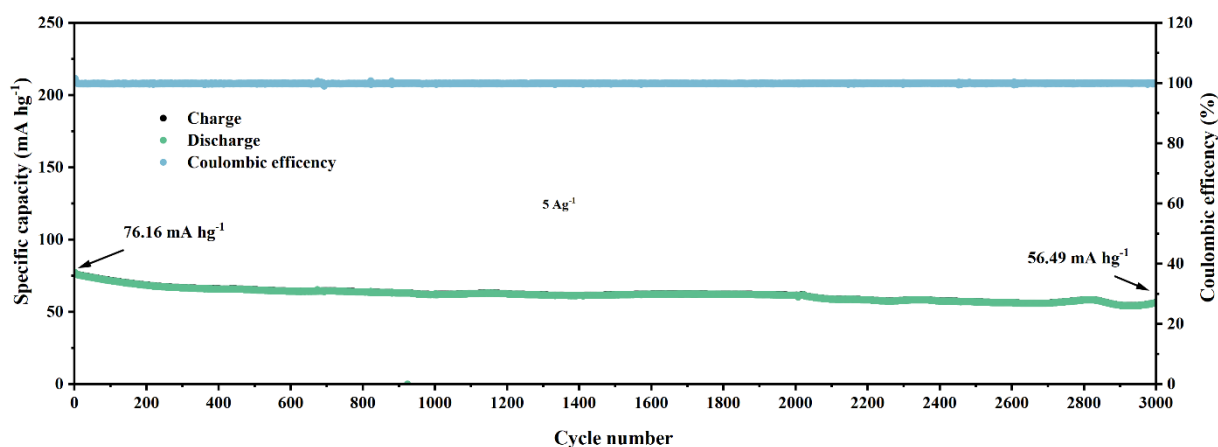

**Fig S15.** Cycling long life of PQACl half-cell running at  $5 \text{ A g}^{-1}$

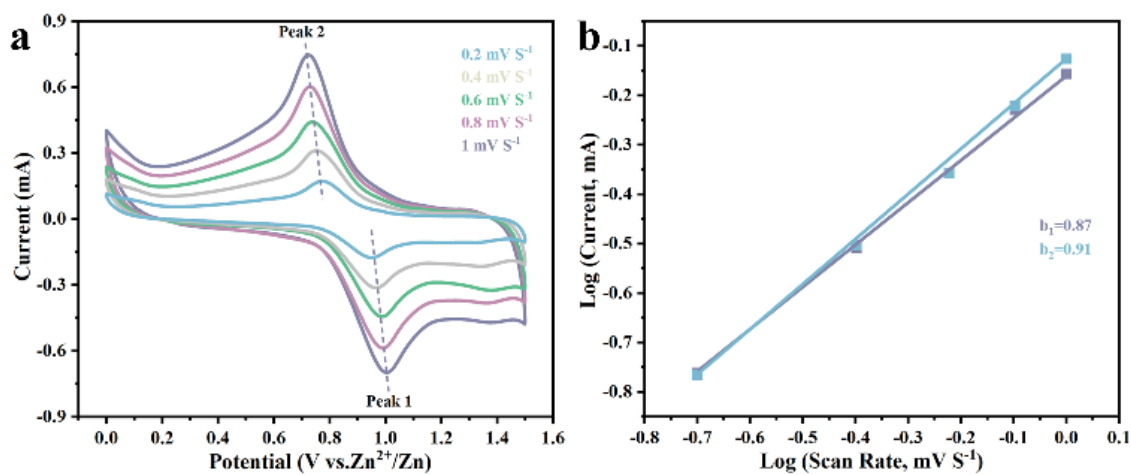

**Fig S16.** PQACl half cell (a) CV curves at the scan rates ranging from 0.2 to  $1.0 \text{ mV s}^{-1}$ . (b)  $b$  values calculated via  $\log(i)$  and  $\log(v)$  linear fit plots.

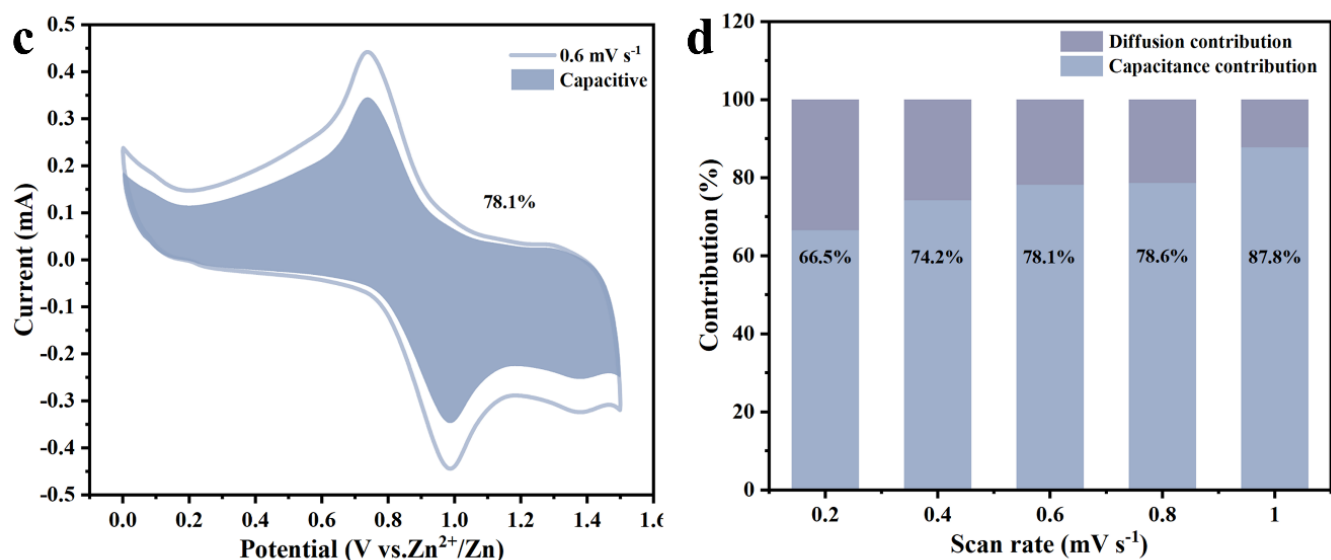

**Fig S17.** PQACl half cell (a) contribution of capacitive and diffusion control running under  $0.6 \text{ mV s}^{-1}$  and (b) under the scan rates ranging from  $0.2$  to  $1.0 \text{ mV s}^{-1}$ .

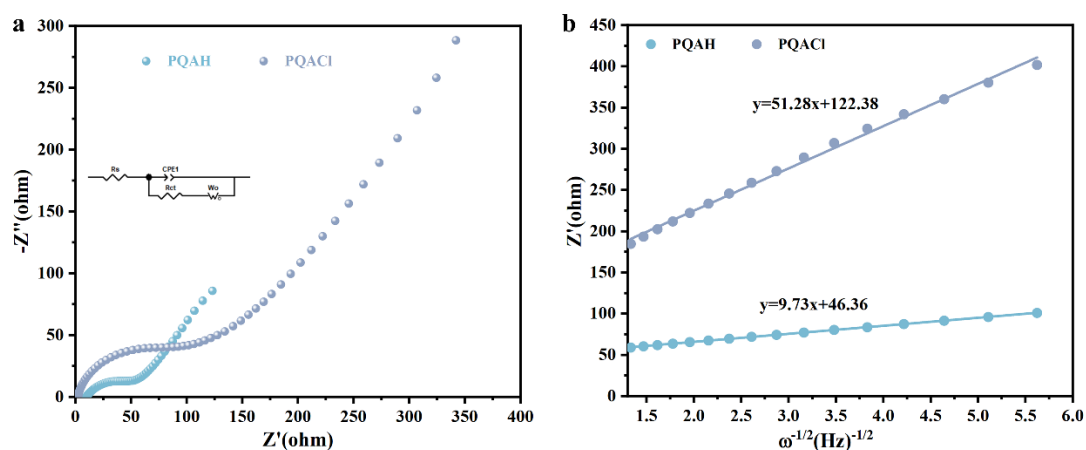

**Fig S18.** (a) Impedance spectra collected at open-circuit voltage of PQA and PQACl; (b) The relation between  $Z_{re}$  and  $\omega^{-1/2}$  at low frequency of PQA and PQACl.

**Table S1.** Electrochemical properties of the PQA and PQACl.

| Polymers Code | $\lambda_{onset}^{Abs}$<br>(nm) | $E_{onset}^b$ | $E_{1/2}^c$<br>(v) | $E_{electro}^d$ (eV) |            |       | $E_{quantum}^e$ (eV) |            |       |
|---------------|---------------------------------|---------------|--------------------|----------------------|------------|-------|----------------------|------------|-------|
|               |                                 |               |                    | $E_{HOMO}$           | $E_{LUMO}$ | $E_g$ | $E_{HOMO}$           | $E_{LUMO}$ | $E_g$ |
| PQA           | 568                             | 0.66          | 1.03               | -5.09                | -2.91      | 2.18  | -5.19                | -3.40      | 1.79  |
| PQACl         | 582                             | 0.75          | 0.89               | -5.18                | -3.13      | 2.05  | -5.20                | -3.84      | 1.36  |

<sup>a</sup>  $\lambda_{onset}$  of polymers in NMP solution ( $1 \times 10^{-5} \text{ mol} \cdot \text{L}^{-1}$ ).

<sup>b</sup> Onset potential (vs Ag/AgCl) of the polymers was calculated from CV curve in 0.1 M LiTFSI in  $\text{CH}_3\text{CN}$ .

<sup>c</sup>  $E_{1/2}$  of polymers is the average potential of the redox couple peaks.

<sup>d</sup>  $E_{LUMO} = E_{HOMO} + E_g$ ;  $E_g = 1240/\lambda_{onset}$  (nm).

<sup>e</sup> Quantum theoretical calculation of the polymers.

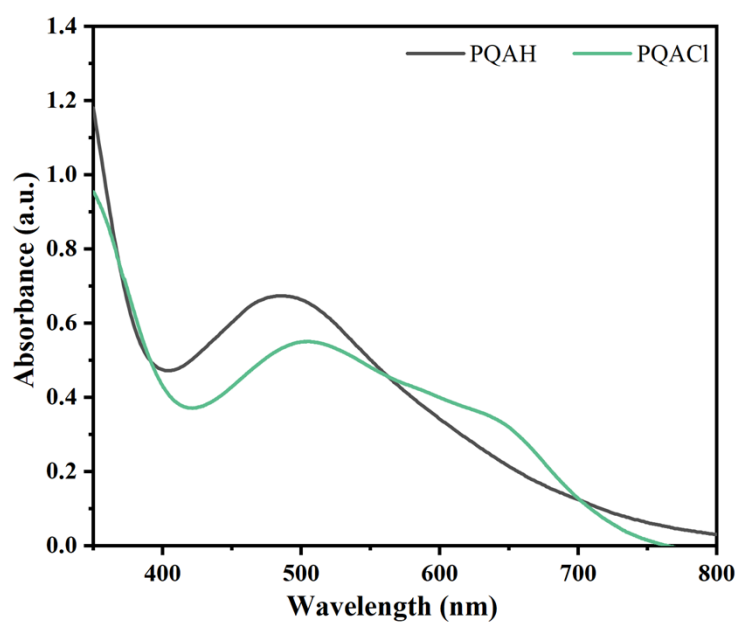**Fig S19.** UV-Vis absorption spectra of PQA and PQACl in DMF solution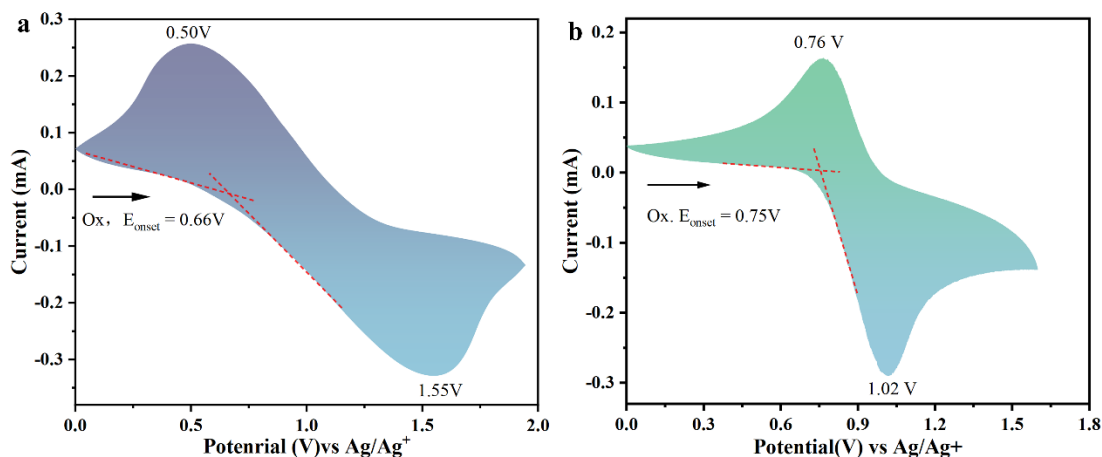**Fig S20.** The CV curves of PQA (a), PQACl (b) on the ITO-coated glass substrate in 0.1 mol L<sup>-1</sup> LiTFSI/ACN solution at a scan rate of 50 mV s<sup>-1</sup>.

**Table S2.** EC properties of the polymers.

| Polymers Code | $\lambda^a$ (nm) | $\Delta T$ (%) | Response time <sup>b</sup> |           | $\Delta OD^c$ | $Q_d^d$ (mC·cm <sup>-1</sup> ) | CE <sup>e</sup> (mC·cm <sup>-1</sup> ) |
|---------------|------------------|----------------|----------------------------|-----------|---------------|--------------------------------|----------------------------------------|
|               |                  |                | $t_c$ (s)                  | $t_b$ (s) |               |                                |                                        |
| P1            | 418              | 38.2           | 1.5                        | 1.6       | 0.319         | 1.62                           | 233.9                                  |
| P2            | 440              | 44.2           | 0.5                        | 1.1       | 0.336         | 1.94                           | 173.2                                  |

<sup>a</sup> Maximum absorption wavelength of polymers films.

<sup>b</sup> The time for the polymers film to reach 90% of the full-absorption change.

<sup>c</sup> Optical density ( $\Delta OD$ ) =  $\log(T_{\text{bleached}}/T_{\text{colored}})$ , where  $T_b$  and  $T_c$  are the transmittances in the bleached state and colored state, respectively.

<sup>d</sup>  $Q_d$  is ejected charge.

<sup>e</sup>  $CE = \Delta OD/Q_d$ .

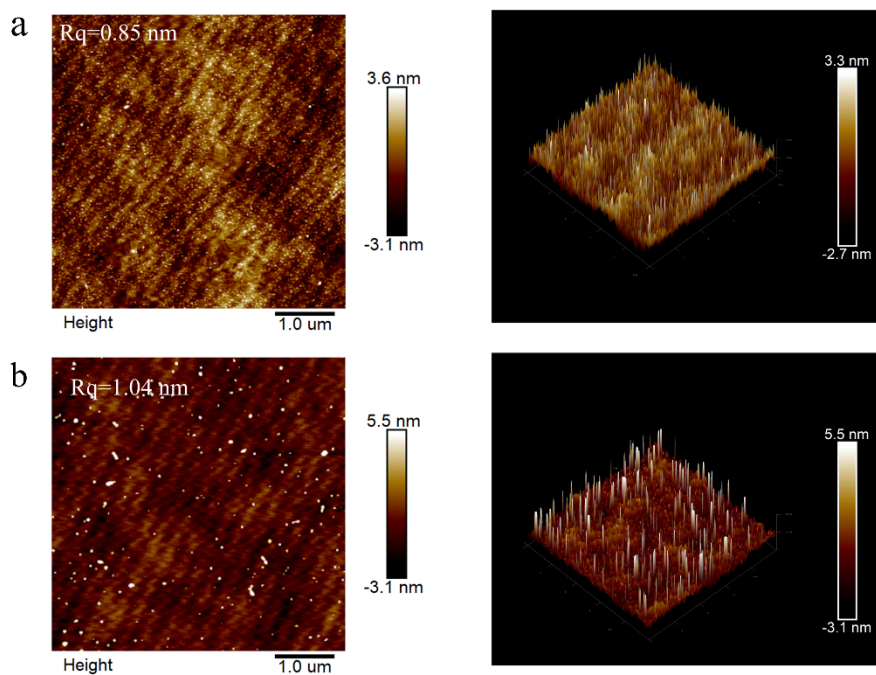**Fig S21.** AFM images of PQAHA(a) and PQACl(b) polymer films.

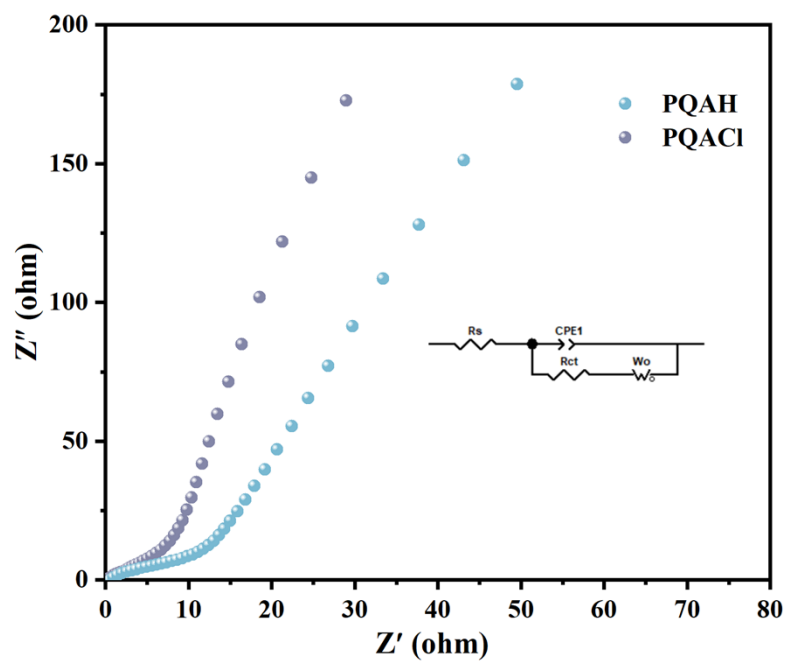

**Fig S22.** Impedance spectra of PQA and PQACl films collected at open circuit voltage.
